# Supplementary material for: Comparison of the Effects of Yokukansan and Yokukansankachimpihange on Glutamate Uptake by Cultured Astrocytes and Glutamate-Induced Excitotoxicity in Cultured PC12 Cells
Source: Hindawi journal article supplement (doi:10.1155/2019/9139536), 2019-05-27
Supplement: f1 [file 9139536.f1.pdf]

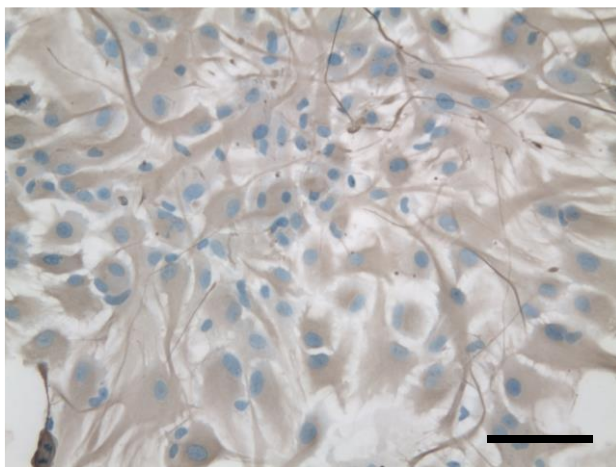

Supplementary Figure 1.
